# Supplementary material
Source: PubMed Central journal article supplement (PMC6125491)
Supplement: zac009187470s1.pdf [file zac009187470s1.pdf]

1 **Supporting Information**

2 **Screening of preselected libraries targeting *Mycobacterium***

3 ***abscessus* for drug discovery**

4 Adrian Richter<sup>1</sup>, Angelika Strauch<sup>1</sup>, Joseph Chao<sup>1</sup>, Mary Ko<sup>1</sup>, Yossef Av-Gay<sup>1,2#</sup>

5 Division of Infectious Diseases, Departments of Medicine<sup>1</sup> and Microbiology and

6 Immunology<sup>2</sup>, Life Sciences Institute, University of British Columbia, Vancouver, British

7 Columbia, Canada

8

9 #Corresponding author

10 Professor Yossef Av-Gay

11 Division of Infectious Diseases 17 UBC Infectious Diseases

12 2350 Health Sciences Mall

13 Vancouver, BC V6T 1Z3

14 yossi@mail.ubc.ca

15

16

17

18

19

20

21

22

23 **TABLE S1.** Pathogen Box<sup>1</sup> activity data (% inhibition based on RFP signal, Z' score = 0.70 ± 0.12)

| Rack               | Position | COMPOUND ID | 10 $\mu$ M      | 10 $\mu$ M      |
|--------------------|----------|-------------|-----------------|-----------------|
|                    |          |             | <i>in vitro</i> | <i>in vitro</i> |
|                    |          |             | [%] inhibition  | [%] inhibition  |
|                    |          |             | 7H9             | MHII            |
| PathogenBox_PlateA | A02      | MMV010764   | <90             | 5               |
| PathogenBox_PlateA | A03      | MMV688472   | < 90            | 18              |
| PathogenBox_PlateA | A04      | MMV688416   | < 90            | -9              |
| PathogenBox_PlateA | A05      | MMV689758   | 100             | 99              |
| PathogenBox_PlateA | A06      | MMV688796   | < 90            | 10              |
| PathogenBox_PlateA | A07      | MMV676526   | < 90            | 61              |
| PathogenBox_PlateA | A08      | MMV688553   | < 90            | -4              |
| PathogenBox_PlateA | A09      | MMV676501   | < 90            | 3               |
| PathogenBox_PlateA | A10      | MMV676449   | < 90            | 9               |
| PathogenBox_PlateA | A11      | MMV676412   | < 90            | 34              |
| PathogenBox_PlateA | B02      | MMV1110498  | < 90            | 0               |
| PathogenBox_PlateA | B03      | MMV000907   | < 90            | 3               |
| PathogenBox_PlateA | B04      | MMV688889   | < 90            | 9               |
| PathogenBox_PlateA | B05      | MMV688776   | < 90            | 1               |
| PathogenBox_PlateA | B06      | MMV688934   | < 90            | 25              |
| PathogenBox_PlateA | B07      | MMV676389   | < 90            | 7               |
| PathogenBox_PlateA | B08      | MMV676603   | < 90            | 10              |
| PathogenBox_PlateA | B09      | MMV676401   | < 90            | 9               |
| PathogenBox_PlateA | B10      | MMV102872   | < 90            | 7               |
| PathogenBox_PlateA | B11      | MMV676477   | < 90            | -6              |
| PathogenBox_PlateA | C02      | MMV084603   | < 90            | 1               |
| PathogenBox_PlateA | C03      | MMV688548   | < 90            | 7               |
| PathogenBox_PlateA | C04      | MMV688888   | < 90            | 22              |
| PathogenBox_PlateA | C05      | MMV690028   | < 90            | 10              |
| PathogenBox_PlateA | C06      | MMV688943   | < 90            | 12              |
| PathogenBox_PlateA | C07      | MMV053220   | < 90            | 16              |
| PathogenBox_PlateA | C08      | MMV676584   | < 90            | 5               |
| PathogenBox_PlateA | C09      | MMV676439   | < 90            | 14              |
| PathogenBox_PlateA | C10      | MMV676395   | < 90            | 16              |
| PathogenBox_PlateA | C11      | MMV676379   | < 90            | 13              |
| PathogenBox_PlateA | D02      | MMV687762   | < 90            | 16              |
| PathogenBox_PlateA | D03      | MMV1028806  | < 90            | -4              |
| PathogenBox_PlateA | D04      | MMV661713   | < 90            | -10             |
| PathogenBox_PlateA | D05      | MMV688793   | < 90            | 14              |
| PathogenBox_PlateA | D06      | MMV688942   | < 90            | 13              |
| PathogenBox_PlateA | D07      | MMV688554   | < 90            | 22              |
| PathogenBox_PlateA | D08      | MMV676555   | < 90            | 33              |
| PathogenBox_PlateA | D09      | MMV676383   | < 90            | 9               |
| PathogenBox_PlateA | D10      | MMV676444   | < 90            | 12              |
| PathogenBox_PlateA | D11      | MMV676409   | < 90            | 2               |
| PathogenBox_PlateA | E02      | MMV688514   | < 90            | 4               |

|                    |     |           |      |     |
|--------------------|-----|-----------|------|-----|
| PathogenBox_PlateA | E03 | MMV676350 | < 90 | -2  |
| PathogenBox_PlateA | E04 | MMV553002 | < 90 | -4  |
| PathogenBox_PlateA | E05 | MMV688797 | < 90 | 13  |
| PathogenBox_PlateA | E06 | MMV688756 | 69   | 48  |
| PathogenBox_PlateA | E07 | MMV090930 | < 90 | 33  |
| PathogenBox_PlateA | E08 | MMV676431 | < 90 | 21  |
| PathogenBox_PlateA | E09 | MMV676571 | < 90 | 1   |
| PathogenBox_PlateA | E10 | MMV676445 | < 90 | 16  |
| PathogenBox_PlateA | E11 | MMV676589 | < 90 | 8   |
| PathogenBox_PlateA | F02 | MMV026020 | < 90 | 2   |
| PathogenBox_PlateA | F03 | MMV688471 | < 90 | 7   |
| PathogenBox_PlateA | F04 | MMV676388 | < 90 | 26  |
| PathogenBox_PlateA | F05 | MMV202553 | < 90 | 16  |
| PathogenBox_PlateA | F06 | MMV688936 | < 90 | 7   |
| PathogenBox_PlateA | F07 | MMV676476 | < 90 | 1   |
| PathogenBox_PlateA | F08 | MMV676377 | < 90 | 9   |
| PathogenBox_PlateA | F09 | MMV676406 | < 90 | -10 |
| PathogenBox_PlateA | F10 | MMV676461 | < 90 | 6   |
| PathogenBox_PlateA | F11 | MMV676509 | < 90 | 4   |
| PathogenBox_PlateA | G02 | MMV688470 | < 90 | -9  |
| PathogenBox_PlateA | G03 | MMV688704 | < 90 | 4   |
| PathogenBox_PlateA | G04 | MMV188296 | < 90 | -1  |
| PathogenBox_PlateA | G05 | MMV688958 | < 90 | 10  |
| PathogenBox_PlateA | G06 | MMV063404 | < 90 | 10  |
| PathogenBox_PlateA | G07 | MMV676558 | < 90 | 1   |
| PathogenBox_PlateA | G08 | MMV688555 | < 90 | 8   |
| PathogenBox_PlateA | G09 | MMV676597 | < 90 | -21 |
| PathogenBox_PlateA | G10 | MMV676588 | < 90 | 2   |
| PathogenBox_PlateA | G11 | MMV676554 | < 90 | -8  |
| PathogenBox_PlateA | H02 | MMV688350 | < 90 | -2  |
| PathogenBox_PlateA | H03 | MMV688360 | < 90 | -1  |
| PathogenBox_PlateA | H04 | MMV099637 | < 90 | -3  |
| PathogenBox_PlateA | H05 | MMV688798 | < 90 | 2   |
| PathogenBox_PlateA | H06 | MMV676539 | < 90 | 5   |
| PathogenBox_PlateA | H07 | MMV202458 | < 90 | -7  |
| PathogenBox_PlateA | H08 | MMV676474 | < 90 | 2   |
| PathogenBox_PlateA | H09 | MMV461553 | < 90 | 27  |
| PathogenBox_PlateA | H10 | MMV676520 | < 90 | -4  |
| PathogenBox_PlateA | H11 | MMV676512 | < 90 | -8  |
| PathogenBox_PlateB | A02 | MMV676480 | -17  | 0   |
| PathogenBox_PlateB | A03 | MMV652003 | -17  | 7   |
| PathogenBox_PlateB | A04 | MMV000062 | 39   | -41 |
| PathogenBox_PlateB | A05 | MMV006372 | 51   | 2   |
| PathogenBox_PlateB | A06 | MMV688854 | -4   | 0   |
| PathogenBox_PlateB | A07 | MMV011903 | 60   | -1  |
| PathogenBox_PlateB | A08 | MMV020591 | 40   | 10  |
| PathogenBox_PlateB | A09 | MMV020623 | 33   | 3   |

|                    |     |           |     |     |
|--------------------|-----|-----------|-----|-----|
| PathogenBox_PlateB | A10 | MMV020512 | 53  | 7   |
| PathogenBox_PlateB | A11 | MMV688761 | 40  | 9   |
| PathogenBox_PlateB | B02 | MMV012074 | 35  | 2   |
| PathogenBox_PlateB | B03 | MMV676604 | 37  | 5   |
| PathogenBox_PlateB | B04 | MMV002529 | 38  | 6   |
| PathogenBox_PlateB | B05 | MMV687776 | 38  | -15 |
| PathogenBox_PlateB | B06 | MMV687800 | 100 | 89  |
| PathogenBox_PlateB | B07 | MMV020982 | 37  | -9  |
| PathogenBox_PlateB | B08 | MMV020120 | 35  | -1  |
| PathogenBox_PlateB | B09 | MMV676605 | 25  | 0   |
| PathogenBox_PlateB | B10 | MMV007638 | 33  | -2  |
| PathogenBox_PlateB | B11 | MMV021057 | 32  | 1   |
| PathogenBox_PlateB | C02 | MMV690027 | 30  | -12 |
| PathogenBox_PlateB | C03 | MMV676600 | 29  | -8  |
| PathogenBox_PlateB | C04 | MMV676382 | 10  | -4  |
| PathogenBox_PlateB | C05 | MMV001625 | 28  | 16  |
| PathogenBox_PlateB | C06 | MMV001493 | 44  | 19  |
| PathogenBox_PlateB | C07 | MMV020136 | 30  | -5  |
| PathogenBox_PlateB | C08 | MMV020710 | 35  | -5  |
| PathogenBox_PlateB | C09 | MMV020517 | 25  | 7   |
| PathogenBox_PlateB | C10 | MMV019721 | 26  | -2  |
| PathogenBox_PlateB | C11 | MMV688763 | 7   | 12  |
| PathogenBox_PlateB | D02 | MMV020537 | 15  | -19 |
| PathogenBox_PlateB | D03 | MMV637953 | 27  | 1   |
| PathogenBox_PlateB | D04 | MMV676536 | 6   | -1  |
| PathogenBox_PlateB | D05 | MMV000063 | 22  | -5  |
| PathogenBox_PlateB | D06 | MMV689255 | 14  | 6   |
| PathogenBox_PlateB | D07 | MMV019838 | 17  | -5  |
| PathogenBox_PlateB | D08 | MMV020520 | 38  | 5   |
| PathogenBox_PlateB | D09 | MMV019234 | 15  | -5  |
| PathogenBox_PlateB | D10 | MMV016136 | 17  | 6   |
| PathogenBox_PlateB | D11 | MMV688762 | 24  | -4  |
| PathogenBox_PlateB | E02 | MMV676386 | 29  | 5   |
| PathogenBox_PlateB | E03 | MMV688773 | 18  | 2   |
| PathogenBox_PlateB | E04 | MMV000011 | 49  | -1  |
| PathogenBox_PlateB | E05 | MMV687775 | 24  | 0   |
| PathogenBox_PlateB | E06 | MMV002817 | 36  | -8  |
| PathogenBox_PlateB | E07 | MMV676442 | 25  | -7  |
| PathogenBox_PlateB | E08 | MMV020152 | 36  | 23  |
| PathogenBox_PlateB | E09 | MMV024397 | 31  | 1   |
| PathogenBox_PlateB | E10 | MMV019807 | 27  | 0   |
| PathogenBox_PlateB | E11 | MMV560185 | 24  | -9  |
| PathogenBox_PlateB | F02 | MMV019189 | 41  | -15 |
| PathogenBox_PlateB | F03 | MMV688774 | 41  | -1  |
| PathogenBox_PlateB | F04 | MMV003270 | 34  | -7  |
| PathogenBox_PlateB | F05 | MMV637229 | 34  | -19 |
| PathogenBox_PlateB | F06 | MMV688853 | 41  | 13  |

|                    |     |           |     |     |
|--------------------|-----|-----------|-----|-----|
| PathogenBox_PlateB | F07 | MMV020321 | 37  | 2   |
| PathogenBox_PlateB | F08 | MMV019087 | 39  | 3   |
| PathogenBox_PlateB | F09 | MMV676528 | 35  | 8   |
| PathogenBox_PlateB | F10 | MMV020320 | 42  | -3  |
| PathogenBox_PlateB | F11 | MMV085210 | 36  | 33  |
| PathogenBox_PlateB | G02 | MMV069458 | 51  | -13 |
| PathogenBox_PlateB | G03 | MMV688991 | 34  | -5  |
| PathogenBox_PlateB | G04 | MMV687801 | 39  | -12 |
| PathogenBox_PlateB | G05 | MMV689480 | 34  | 10  |
| PathogenBox_PlateB | G06 | MMV003152 | 39  | 4   |
| PathogenBox_PlateB | G07 | MMV006239 | 38  | -12 |
| PathogenBox_PlateB | G08 | MMV000858 | 31  | 5   |
| PathogenBox_PlateB | G09 | MMV006741 | 43  | -3  |
| PathogenBox_PlateB | G10 | MMV688768 | 26  | -2  |
| PathogenBox_PlateB | G11 | MMV000023 | -2  | 26  |
| PathogenBox_PlateB | H02 | MMV676602 | 51  | -12 |
| PathogenBox_PlateB | H03 | MMV000014 | 34  | -4  |
| PathogenBox_PlateB | H04 | MMV687803 | 90  | 92  |
| PathogenBox_PlateB | H05 | MMV668727 | 3   | -2  |
| PathogenBox_PlateB | H06 | MMV019742 | 53  | 5   |
| PathogenBox_PlateB | H07 | MMV009054 | 40  | -15 |
| PathogenBox_PlateB | H08 | MMV006901 | 41  | -45 |
| PathogenBox_PlateB | H09 | MMV020391 | 39  | 2   |
| PathogenBox_PlateB | H10 | MMV676380 | 38  | -4  |
| PathogenBox_PlateB | H11 | MMV688994 | 48  | 17  |
| PathogenBox_PlateC | A02 | MMV675997 | 20  | -4  |
| PathogenBox_PlateC | A03 | MMV676204 | 7   | 5   |
| PathogenBox_PlateC | A04 | MMV687239 | 11  | -5  |
| PathogenBox_PlateC | A05 | MMV688122 | 12  | -8  |
| PathogenBox_PlateC | A06 | MMV688852 | 6   | -12 |
| PathogenBox_PlateC | A07 | MMV687145 | 19  | 0   |
| PathogenBox_PlateC | A08 | MMV688327 | 24  | 17  |
| PathogenBox_PlateC | A09 | MMV008439 | -5  | -2  |
| PathogenBox_PlateC | A10 | MMV595321 | -15 | -9  |
| PathogenBox_PlateC | A11 | MMV687747 | -19 | -1  |
| PathogenBox_PlateC | B02 | MMV020388 | 0   | -16 |
| PathogenBox_PlateC | B03 | MMV688547 | 5   | 12  |
| PathogenBox_PlateC | B04 | MMV688466 | 20  | 3   |
| PathogenBox_PlateC | B05 | MMV687749 | -12 | -6  |
| PathogenBox_PlateC | B06 | MMV688846 | 100 | 99  |
| PathogenBox_PlateC | B07 | MMV054312 | -7  | 3   |
| PathogenBox_PlateC | B08 | MMV689060 | -22 | -6  |
| PathogenBox_PlateC | B09 | MMV689061 | -22 | -31 |
| PathogenBox_PlateC | B10 | MMV689028 | 3   | -12 |
| PathogenBox_PlateC | B11 | MMV688371 | 1   | -2  |
| PathogenBox_PlateC | C02 | MMV688508 | 100 | 91  |
| PathogenBox_PlateC | C03 | MMV688283 | -8  | 8   |

|                    |     |            |     |     |
|--------------------|-----|------------|-----|-----|
| PathogenBox_PlateC | C04 | MMV687243  | 11  | 0   |
| PathogenBox_PlateC | C05 | MMV687730  | 9   | 96  |
| PathogenBox_PlateC | C06 | MMV687251  | 7   | 17  |
| PathogenBox_PlateC | C07 | MMV687254  | -24 | 2   |
| PathogenBox_PlateC | C08 | MMV688509  | 5   | 4   |
| PathogenBox_PlateC | C09 | MMV688361  | 8   | -15 |
| PathogenBox_PlateC | C10 | MMV689029  | 9   | 3   |
| PathogenBox_PlateC | C11 | MMV022236  | 15  | -17 |
| PathogenBox_PlateC | D02 | MMV688410  | 11  | -10 |
| PathogenBox_PlateC | D03 | MMV676048  | -10 | -31 |
| PathogenBox_PlateC | D04 | MMV687703  | -5  | -3  |
| PathogenBox_PlateC | D05 | MMV687248  | 14  | -34 |
| PathogenBox_PlateC | D06 | MMV688125  | 10  | 8   |
| PathogenBox_PlateC | D07 | MMV687188  | 5   | -16 |
| PathogenBox_PlateC | D08 | MMV690103  | 5   | -37 |
| PathogenBox_PlateC | D09 | MMV688124  | 10  | 4   |
| PathogenBox_PlateC | D10 | MMV688845  | 100 | 92  |
| PathogenBox_PlateC | D11 | MMV1030799 | -12 | -5  |
| PathogenBox_PlateC | E02 | MMV675994  | 4   | -24 |
| PathogenBox_PlateC | E03 | MMV676057  | 11  | -24 |
| PathogenBox_PlateC | E04 | MMV687699  | 7   | 3   |
| PathogenBox_PlateC | E05 | MMV687146  | 100 | 97  |
| PathogenBox_PlateC | E06 | MMV687696  | 7   | -5  |
| PathogenBox_PlateC | E07 | MMV687170  | 8   | 11  |
| PathogenBox_PlateC | E08 | MMV690102  | 27  | -7  |
| PathogenBox_PlateC | E09 | MMV689709  | 19  | 7   |
| PathogenBox_PlateC | E10 | MMV021375  | 6   | -15 |
| PathogenBox_PlateC | E11 | MMV1029203 | 8   | -9  |
| PathogenBox_PlateC | F02 | MMV676053  | 16  | -13 |
| PathogenBox_PlateC | F03 | MMV688179  | 11  | -36 |
| PathogenBox_PlateC | F04 | MMV023969  | 13  | 10  |
| PathogenBox_PlateC | F05 | MMV687138  | 8   | -4  |
| PathogenBox_PlateC | F06 | MMV688262  | 9   | -8  |
| PathogenBox_PlateC | F07 | MMV687189  | 12  | -6  |
| PathogenBox_PlateC | F08 | MMV687807  | 9   | 100 |
| PathogenBox_PlateC | F09 | MMV676478  | 13  | 7   |
| PathogenBox_PlateC | F10 | MMV062221  | 17  | -6  |
| PathogenBox_PlateC | F11 | MMV688921  | 9   | -40 |
| PathogenBox_PlateC | G02 | MMV676191  | 17  | -27 |
| PathogenBox_PlateC | G03 | MMV675993  | 10  | 3   |
| PathogenBox_PlateC | G04 | MMV021660  | 14  | 11  |
| PathogenBox_PlateC | G05 | MMV688417  | 9   | -5  |
| PathogenBox_PlateC | G06 | MMV687273  | 14  | -2  |
| PathogenBox_PlateC | G07 | MMV687180  | 10  | -13 |
| PathogenBox_PlateC | G08 | MMV1088520 | 15  | -5  |
| PathogenBox_PlateC | G09 | MMV688891  | 5   | 8   |
| PathogenBox_PlateC | G10 | MMV023370  | 8   | -12 |

|                    |     |            |     |     |
|--------------------|-----|------------|-----|-----|
| PathogenBox_PlateC | G11 | MMV688703  | 9   | -3  |
| PathogenBox_PlateC | H02 | MMV675969  | 28  | -8  |
| PathogenBox_PlateC | H03 | MMV688313  | 14  | -2  |
| PathogenBox_PlateC | H04 | MMV687172  | 21  | 11  |
| PathogenBox_PlateC | H05 | MMV688844  | 100 | 96  |
| PathogenBox_PlateC | H06 | MMV1198433 | 24  | -37 |
| PathogenBox_PlateC | H07 | MMV024311  | 15  | -7  |
| PathogenBox_PlateC | H08 | MMV1019989 | 16  | 0   |
| PathogenBox_PlateC | H09 | MMV1037162 | 36  | -39 |
| PathogenBox_PlateC | H10 | MMV689437  | 37  | 0   |
| PathogenBox_PlateC | H11 | MMV688955  | 22  | -28 |
| PathogenBox_PlateD | A02 | MMV026468  | 10  | 16  |
| PathogenBox_PlateD | A03 | MMV020670  | -6  | 7   |
| PathogenBox_PlateD | A04 | MMV023953  | 5   | 18  |
| PathogenBox_PlateD | A05 | MMV010576  | 17  | 11  |
| PathogenBox_PlateD | A06 | MMV032967  | 14  | 16  |
| PathogenBox_PlateD | A07 | MMV031011  | -7  | -27 |
| PathogenBox_PlateD | A08 | MMV688178  | 12  | -13 |
| PathogenBox_PlateD | A09 | MMV688362  | 3   | 26  |
| PathogenBox_PlateD | A10 | MMV687706  | 20  | 6   |
| PathogenBox_PlateD | A11 | MMV026356  | 13  | -26 |
| PathogenBox_PlateD | B02 | MMV011511  | 6   | -57 |
| PathogenBox_PlateD | B03 | MMV007625  | 1   | 7   |
| PathogenBox_PlateD | B04 | MMV007471  | 6   | 18  |
| PathogenBox_PlateD | B05 | MMV024829  | 25  | 17  |
| PathogenBox_PlateD | B06 | MMV045105  | 2   | 31  |
| PathogenBox_PlateD | B07 | MMV022029  | -6  | -5  |
| PathogenBox_PlateD | B08 | MMV676064  | 12  | -14 |
| PathogenBox_PlateD | B09 | MMV688180  | 20  | 11  |
| PathogenBox_PlateD | B10 | MMV024035  | 19  | 27  |
| PathogenBox_PlateD | B11 | MMV688941  | 14  | -47 |
| PathogenBox_PlateD | C02 | MMV020291  | 12  | -12 |
| PathogenBox_PlateD | C03 | MMV006833  | 15  | 6   |
| PathogenBox_PlateD | C04 | MMV026490  | 2   | 25  |
| PathogenBox_PlateD | C05 | MMV687246  | 9   | -2  |
| PathogenBox_PlateD | C06 | MMV676162  | 12  | 19  |
| PathogenBox_PlateD | C07 | MMV024114  | 11  | -6  |
| PathogenBox_PlateD | C08 | MMV688467  | 9   | 15  |
| PathogenBox_PlateD | C09 | MMV675998  | 10  | 20  |
| PathogenBox_PlateD | C10 | MMV659010  | 13  | 15  |
| PathogenBox_PlateD | C11 | MMV676008  | 5   | -2  |
| PathogenBox_PlateD | D02 | MMV676269  | 12  | 5   |
| PathogenBox_PlateD | D03 | MMV020081  | 6   | 14  |
| PathogenBox_PlateD | D04 | MMV026550  | 25  | 13  |
| PathogenBox_PlateD | D05 | MMV675995  | 3   | 22  |
| PathogenBox_PlateD | D06 | MMV688274  | 35  | -9  |
| PathogenBox_PlateD | D07 | MMV023860  | 14  | 13  |

|                    |     |           |     |      |
|--------------------|-----|-----------|-----|------|
| PathogenBox_PlateD | D08 | MMV688407 | -13 | 20   |
| PathogenBox_PlateD | D09 | MMV023949 | 5   | -209 |
| PathogenBox_PlateD | D10 | MMV676050 | 4   | -293 |
| PathogenBox_PlateD | D11 | MMV024406 | 11  | -161 |
| PathogenBox_PlateD | E02 | MMV023233 | 23  | -5   |
| PathogenBox_PlateD | E03 | MMV085230 | 34  | 2    |
| PathogenBox_PlateD | E04 | MMV085071 | 11  | 18   |
| PathogenBox_PlateD | E05 | MMV659004 | 27  | 10   |
| PathogenBox_PlateD | E06 | MMV676260 | 14  | 26   |
| PathogenBox_PlateD | E07 | MMV688364 | 8   | 18   |
| PathogenBox_PlateD | E08 | MMV032995 | 2   | 20   |
| PathogenBox_PlateD | E09 | MMV688279 | 9   | 2    |
| PathogenBox_PlateD | E10 | MMV688271 | 3   | 1    |
| PathogenBox_PlateD | E11 | MMV019790 | -4  | -14  |
| PathogenBox_PlateD | F02 | MMV009135 | 18  | 5    |
| PathogenBox_PlateD | F03 | MMV011765 | 8   | 10   |
| PathogenBox_PlateD | F04 | MMV024937 | 18  | 19   |
| PathogenBox_PlateD | F05 | MMV085499 | 16  | 11   |
| PathogenBox_PlateD | F06 | MMV023985 | 9   | 14   |
| PathogenBox_PlateD | F07 | MMV024195 | 25  | 6    |
| PathogenBox_PlateD | F08 | MMV676063 | 10  | 9    |
| PathogenBox_PlateD | F09 | MMV676186 | 10  | 21   |
| PathogenBox_PlateD | F10 | MMV688474 | 27  | -107 |
| PathogenBox_PlateD | F11 | MMV687812 | 27  | 40   |
| PathogenBox_PlateD | G02 | MMV007803 | 18  | -32  |
| PathogenBox_PlateD | G03 | MMV001059 | 13  | 13   |
| PathogenBox_PlateD | G04 | MMV011691 | 13  | -4   |
| PathogenBox_PlateD | G05 | MMV676877 | 11  | 22   |
| PathogenBox_PlateD | G06 | MMV663250 | 12  | 20   |
| PathogenBox_PlateD | G07 | MMV407539 | 9   | 17   |
| PathogenBox_PlateD | G08 | MMV688372 | 22  | 16   |
| PathogenBox_PlateD | G09 | MMV658993 | 18  | -206 |
| PathogenBox_PlateD | G10 | MMV676182 | 12  | -411 |
| PathogenBox_PlateD | G11 | MMV676411 | 22  | -61  |
| PathogenBox_PlateD | H02 | MMV007133 | 11  | -42  |
| PathogenBox_PlateD | H03 | MMV022478 | 1   | 22   |
| PathogenBox_PlateD | H04 | MMV024101 | 26  | 12   |
| PathogenBox_PlateD | H05 | MMV676881 | 7   | 8    |
| PathogenBox_PlateD | H06 | MMV024443 | 16  | -15  |
| PathogenBox_PlateD | H07 | MMV688469 | 15  | -1   |
| PathogenBox_PlateD | H08 | MMV023388 | 16  | 8    |
| PathogenBox_PlateD | H09 | MMV675968 | 6   | -39  |
| PathogenBox_PlateD | H10 | MMV675996 | 16  | 1    |
| PathogenBox_PlateD | H11 | MMV688980 | 7   | -73  |
| PathogenBox_PlateE | A02 | MMV011229 | 4   | 18   |
| PathogenBox_PlateE | A03 | MMV676468 | 10  | 41   |
| PathogenBox_PlateE | A04 | MMV688771 | 9   | -38  |



|                    |     |           |     |     |
|--------------------|-----|-----------|-----|-----|
| PathogenBox_PlateE | A05 | MMV687798 | 86  | 23  |
| PathogenBox_PlateE | A06 | MMV688775 | 8   | 27  |
| PathogenBox_PlateE | A07 | MMV676159 | 16  | 12  |
| PathogenBox_PlateE | A08 | MMV393144 | 7   | 13  |
| PathogenBox_PlateE | A09 | MMV007920 | 20  | 22  |
| PathogenBox_PlateE | A10 | MMV688270 | 12  | 17  |
| PathogenBox_PlateE | A11 | MMV019993 | 10  | 13  |
| PathogenBox_PlateE | B02 | MMV687794 | 8   | -20 |
| PathogenBox_PlateE | B03 | MMV676470 | 22  | 5   |
| PathogenBox_PlateE | B04 | MMV688938 | 4   | 32  |
| PathogenBox_PlateE | B05 | MMV689000 | 0   | 16  |
| PathogenBox_PlateE | B06 | MMV004168 | -2  | -8  |
| PathogenBox_PlateE | B07 | MMV676161 | 13  | 20  |
| PathogenBox_PlateE | B08 | MMV023183 | 1   | 12  |
| PathogenBox_PlateE | B09 | MMV047015 | 9   | 11  |
| PathogenBox_PlateE | B10 | MMV688795 | 4   | 13  |
| PathogenBox_PlateE | B11 | MMV688352 | 3   | 7   |
| PathogenBox_PlateE | C02 | MMV676398 | 7   | 1   |
| PathogenBox_PlateE | C03 | MMV676472 | 5   | 21  |
| PathogenBox_PlateE | C04 | MMV671636 | 10  | 10  |
| PathogenBox_PlateE | C05 | MMV676599 | 3   | 7   |
| PathogenBox_PlateE | C06 | MMV689244 | 13  | 8   |
| PathogenBox_PlateE | C07 | MMV688411 | 3   | 12  |
| PathogenBox_PlateE | C08 | MMV687765 | 3   | 8   |
| PathogenBox_PlateE | C09 | MMV020165 | -4  | 10  |
| PathogenBox_PlateE | C10 | MMV676524 | 10  | 13  |
| PathogenBox_PlateE | C11 | MMV611037 | 17  | 6   |
| PathogenBox_PlateE | D02 | MMV688766 | 0   | 3   |
| PathogenBox_PlateE | D03 | MMV200748 | 11  | 11  |
| PathogenBox_PlateE | D04 | MMV667494 | 2   | -12 |
| PathogenBox_PlateE | D05 | MMV028694 | 12  | 17  |
| PathogenBox_PlateE | D06 | MMV001499 | 8   | 1   |
| PathogenBox_PlateE | D07 | MMV688345 | 11  | 8   |
| PathogenBox_PlateE | D08 | MMV010545 | 9   | 9   |
| PathogenBox_PlateE | D09 | MMV023227 | 8   | 11  |
| PathogenBox_PlateE | D10 | MMV687700 | 6   | 10  |
| PathogenBox_PlateE | D11 | MMV676384 | 2   | 13  |
| PathogenBox_PlateE | E02 | MMV020289 | 10  | 6   |
| PathogenBox_PlateE | E03 | MMV002816 | 12  | -10 |
| PathogenBox_PlateE | E04 | MMV634140 | 4   | 4   |
| PathogenBox_PlateE | E05 | MMV030734 | 11  | 8   |
| PathogenBox_PlateE | E06 | MMV689243 | 4   | -9  |
| PathogenBox_PlateE | E07 | MMV676358 | 3   | -3  |
| PathogenBox_PlateE | E08 | MMV687729 | 4   | -1  |
| PathogenBox_PlateE | E09 | MMV407834 | 7   | 10  |
| PathogenBox_PlateE | E10 | MMV687813 | -11 | 25  |
| PathogenBox_PlateE | E11 | MMV153413 | 11  | 15  |

|                    |     |            |     |      |
|--------------------|-----|------------|-----|------|
| PathogenBox_PlateE | F02 | MMV019551  | 7   | -8   |
| PathogenBox_PlateE | F03 | MMV688552  | 1   | -15  |
| PathogenBox_PlateE | F04 | MMV016838  | 3   | 9    |
| PathogenBox_PlateE | F05 | MMV676270  | 7   | 17   |
| PathogenBox_PlateE | F06 | MMV688755  | 15  | -9   |
| PathogenBox_PlateE | F07 | MMV228911  | 1   | 12   |
| PathogenBox_PlateE | F08 | MMV272144  | 3   | 9    |
| PathogenBox_PlateE | F09 | MMV026313  | 4   | 10   |
| PathogenBox_PlateE | F10 | MMV161996  | 11  | 9    |
| PathogenBox_PlateE | F11 | MMV688543  | -1  | 0    |
| PathogenBox_PlateE | G02 | MMV146306  | -1  | -19  |
| PathogenBox_PlateE | G03 | MMV688557  | -4  | 11   |
| PathogenBox_PlateE | G04 | MMV021013  | 2   | 0    |
| PathogenBox_PlateE | G05 | MMV392832  | 3   | 3    |
| PathogenBox_PlateE | G06 | MMV688754  | 3   | -14  |
| PathogenBox_PlateE | G07 | MMV001561  | 1   | 12   |
| PathogenBox_PlateE | G08 | MMV658988  | -6  | 16   |
| PathogenBox_PlateE | G09 | MMV084864  | 1   | -29  |
| PathogenBox_PlateE | G10 | MMV676492  | 5   | -3   |
| PathogenBox_PlateE | G11 | MMV688415  | 2   | -199 |
| PathogenBox_PlateE | H02 | MMV688330  | -9  | 7    |
| PathogenBox_PlateE | H03 | MMV687796  | 6   | 52   |
| PathogenBox_PlateE | H04 | MMV688939  | -5  | 1    |
| PathogenBox_PlateE | H05 | MMV688978  | -12 | 96   |
| PathogenBox_PlateE | H06 | MMV688990  | -1  | -33  |
| PathogenBox_PlateE | H07 | MMV688273  | 1   | -72  |
| PathogenBox_PlateE | H08 | MMV393995  | 7   | -2   |
| PathogenBox_PlateE | H09 | MMV1236379 | 7   | 9    |
| PathogenBox_PlateE | H10 | MMV688550  | 14  | -5   |
| PathogenBox_PlateE | H11 | MMV495543  | 7   | -52  |

24

25 **TABLE S2.** GSK small molecule leads<sup>2</sup> activity data (percentage of inhibition based on RFP signal, Z'

26 score = 0.70 ± 0.12)

|              | <b>Plate map-GSK #</b> |             | <b>25 µM</b>          | <b>25 µM</b>          |
|--------------|------------------------|-------------|-----------------------|-----------------------|
|              |                        |             | <i>in vitro</i>       | <i>in vitro</i>       |
| <b>Plate</b> | <b>sample well</b>     | <b>GSK#</b> | <b>[%] inhibition</b> | <b>[%] inhibition</b> |
|              |                        |             | <b>7H9</b>            | <b>MHII</b>           |
| 1            | A1                     | BRL-8088SA  | -77                   | -256                  |
| 1            | B1                     | GSK133167A  | -111                  | -26                   |
| 1            | C1                     | GSK1829820A | -20                   | -89                   |
| 1            | D1                     | GSK1955236A | -16                   | -18                   |
| 1            | E1                     | GSK2200160A | -151                  | 101                   |
| 1            | F1                     | GSK848336A  | -10                   | -15                   |
| 1            | G1                     | GW859039X   | -18                   | -25                   |

|   |    |             |     |      |
|---|----|-------------|-----|------|
| 1 | H1 | SB-204804-A | -26 | -157 |
| 1 | A2 | GSK798463A  | -19 | 45   |
| 1 | B2 | SB-435634   | -19 | -6   |
| 1 | C2 | GSK254610A  | -33 | 1    |
| 1 | D2 | GSK276001A  | -10 | 8    |
| 1 | E2 | GSK437009A  | -20 | 18   |
| 1 | F2 | GSK547543A  | -2  | 25   |
| 1 | G2 | GSK353071A  | -17 | 14   |
| 1 | H2 | GW713556X   | -19 | -6   |
| 1 | A3 | GSK831784A  | -17 | 54   |
| 1 | B3 | GSK754716A  | -15 | 5    |
| 1 | C3 | GSK810037A  | -19 | 3    |
| 1 | D3 | GSK892651A  | -15 | 19   |
| 1 | E3 | GSK921190A  | -4  | 11   |
| 1 | F3 | GSK957094A  | -16 | 12   |
| 1 | G3 | GSK829969A  | -18 | 10   |
| 1 | H3 | GSK1434490A | -18 | 70   |
| 1 | A4 | GSK1402290A | -27 | -36  |
| 1 | B4 | GSK920684A  | -14 | -23  |
| 1 | C4 | GSK1691553A | -12 | -7   |
| 1 | D4 | GSK1742694A | -10 | 14   |
| 1 | E4 | GSK1744926A | -17 | 29   |
| 1 | F4 | GSK1758774A | -4  | 26   |
| 1 | G4 | GSK1829732A | -12 | 8    |
| 1 | H4 | GSK1829819A | -11 | -1   |
| 1 | A5 | GSK1829816A | -15 | -25  |
| 1 | B5 | GSK1729177A | -7  | 17   |
| 1 | C5 | GW857165X   | -19 | 25   |
| 1 | D5 | SB-829405   | -19 | 24   |
| 1 | E5 | GSK847913A  | -13 | 15   |
| 1 | F5 | GSK1611550A | -13 | 20   |
| 1 | G5 | GSK1826247A | -5  | 10   |
| 1 | H5 | GSK1829728A | -6  | -4   |
| 1 | A6 | GSK445886A  | -2  | -23  |
| 1 | B6 | GSK124576A  | -12 | -1   |
| 1 | C6 | GSK1731114A | -21 | -1   |
| 1 | D6 | GSK1832831A | -20 | -22  |
| 1 | E6 | GSK636544A  | -11 | 15   |
| 1 | F6 | GSK695914A  | -15 | 42   |
| 1 | G6 | GSK889423A  | -15 | 14   |
| 1 | H6 | GSK847920A  | -8  | -15  |
| 1 | A7 | GSK1650514A | -15 | -2   |
| 1 | B7 | GSK1750922A | -9  | 64   |
| 1 | C7 | GSK1829736A | -18 | 8    |
| 1 | D7 | SB-516933   | -13 | 7    |
| 1 | E7 | SB-354364   | -15 | 13   |
| 1 | F7 | GSK547511A  | -7  | 28   |

|   |     |             |      |      |
|---|-----|-------------|------|------|
| 1 | G7  | GSK463114A  | -10  | 7    |
| 1 | H7  | GSK479031A  | 2    | -5   |
| 1 | A8  | GSK731389A  | -15  | -61  |
| 1 | B8  | GSK921295A  | -13  | -7   |
| 1 | C8  | GSK1174628A | -24  | -3   |
| 1 | D8  | GSK1051703A | -22  | 7    |
| 1 | E8  | GSK1302651A | -114 | 79   |
| 1 | F8  | GSK1385423A | -5   | 23   |
| 1 | G8  | GSK1826089A | -11  | 19   |
| 1 | H8  | GSK1812410A | -67  | 91   |
| 1 | A9  | GSK1759150A | -26  | 29   |
| 1 | B9  | GSK1859936A | -13  | 2    |
| 1 | C9  | GSK1863309A | 0    | 11   |
| 1 | D9  | GSK1925843A | -21  | 11   |
| 1 | E9  | GSK2157753A | -15  | 38   |
| 1 | F9  | GSK2200157A | 25   | 101  |
| 1 | G9  | GR135487X   | -17  | -5   |
| 1 | H9  | GW623128X   | -88  | 101  |
| 1 | A10 | GSK270670A  | -17  | -21  |
| 1 | B10 | GSK735826A  | -20  | -1   |
| 1 | C10 | GW369335X   | -14  | 9    |
| 1 | D10 | GSK1985270A | 100  | 103  |
| 1 | E10 | BRL-7940SA  | 99   | 65   |
| 1 | F10 | GSK385518A  | -11  | 5    |
| 1 | G10 | GSK498315A  | -10  | 4    |
| 1 | H10 | GSK937213A  | -14  | -41  |
| 1 | A11 | GSK994258A  | -15  | -29  |
| 1 | B11 | GSK1072678A | -14  | 4    |
| 1 | C11 | GSK1788487A | -10  | -14  |
| 1 | D11 | GSK1733953A | -1   | 98*  |
| 1 | E11 | GSK1829727A | -11  | -8   |
| 1 | F11 | GSK1829733A | -13  | 0    |
| 1 | G11 | GSK2059310A | -14  | 16   |
| 1 | H11 | GSK888636A  | -16  | -25  |
| 1 | A12 | GSK1107112A | -15  | -218 |
| 1 | B12 | SB-811137-V | -22  | -103 |
| 1 | C12 | GSK347301A  | -14  | -4   |
| 1 | D12 | GSK426032A  | -11  | 102* |
| 1 | E12 | GSK749336A  | -13  | 8    |
| 1 | F12 | GSK920703A  | -9   | 3    |
| 1 | G12 | GSK1589673A | -15  | -51  |
| 1 | H12 | GSK3011724A | -71  | -352 |
| 2 | A1  | GSK1783710A | -19  | -54  |
| 2 | B1  | GSK1941290A | -15  | -311 |
| 2 | C1  | GSK1829660A | -37  | -71  |
| 2 | D1  | GSK2032710A | -50  | -81  |
| 2 | E1  | GSK937733A  | -80  | -82  |

|   |    |             |      |      |
|---|----|-------------|------|------|
| 2 | F1 | GSK353496A  | -74  | -42  |
| 2 | G1 | GSK1365028A | -14  | -33  |
| 2 | H1 | GSK1635139A | -44  | -95  |
| 2 | A2 | GR153167X   | -10  | -212 |
| 2 | B2 | GW360240X   | -13  | -2   |
| 2 | C2 | CCI7967     | -14  | 32   |
| 2 | D2 | BRL-10988SA | 94   | -30  |
| 2 | E2 | GSK316438A  | -56  | 19   |
| 2 | F2 | SB-746177   | -18  | 33   |
| 2 | G2 | GSK146660A  | -12  | 6    |
| 2 | H2 | GSK345724A  | -69  | -14  |
| 2 | A3 | GSK468214A  | -43  | -22  |
| 2 | B3 | GSK353069A  | -13  | -225 |
| 2 | C3 | GSK991960A  | 23   | 32   |
| 2 | D3 | GSK1372568A | -139 | 17   |
| 2 | E3 | GSK1518999A | -74  | 17   |
| 2 | F3 | GSK1570606A | -70  | 0    |
| 2 | G3 | GSK1829671A | -10  | 19   |
| 2 | H3 | GSK1829676A | -50  | -45  |
| 2 | A4 | GSK1829729A | -8   | -30  |
| 2 | B4 | GSK1829674A | -12  | 34   |
| 2 | C4 | GSK130506A  | 8    | 18   |
| 2 | D4 | GSK358607A  | -62  | -50  |
| 2 | E4 | GSK1589671A | 41   | 14   |
| 2 | F4 | GR135486X   | 5    | 21   |
| 2 | G4 | BRL-8903SA  | 98   | -34  |
| 2 | H4 | GI103688B   | -16  | -4   |
| 2 | A5 | GSK275628A  | -66  | 30   |
| 2 | B5 | BRL-51091AM | 91   | 25   |
| 2 | C5 | GSK381407A  | 11   | 103* |
| 2 | D5 | BRL-51093AM | 17   | 2    |
| 2 | E5 | SB-650816   | 16   | 39   |
| 2 | F5 | GSK547481A  | -3   | 37   |
| 2 | G5 | GSK690382A  | -44  | 0    |
| 2 | H5 | GV187303X   | -10  | 12   |
| 2 | A6 | GSK762874A  | -8   | -61  |
| 2 | B6 | GSK1121877A | 11   | 4    |
| 2 | C6 | GSK1180781A | 43   | -1   |
| 2 | D6 | SB-712970   | -43  | 34   |
| 2 | E6 | GSK1310678A | 42   | 30   |
| 2 | F6 | GSK2200150A | -80  | 5    |
| 2 | G6 | GW861072X   | -87  | 51   |
| 2 | H6 | GSK262906A  | -33  | -42  |
| 2 | A7 | BRL-10143SA | 99   | -103 |
| 2 | B7 | GW664700A   | -98  | -20  |
| 2 | C7 | GSK275984A  | -53  | 64   |
| 2 | D7 | GSK124945A  | 60   | 7    |

|   |    |             |      |     |
|---|----|-------------|------|-----|
| 2 | E7 | GSK810016A  | 33   | 0   |
| 2 | F7 | GSK1826825A | -76  | 22  |
| 2 | G7 | GSK352635A  | -16  | 82  |
| 2 | H7 | GI247341A   | -138 | -55 |
| 2 | A8 | SB-811796-V | -13  | -3  |
| 2 | B8 | GSK1668869A | 64   | 18  |
| 2 | C8 | GSK1055950A | 100  | 99  |
| 2 | D8 | GSK1857145A | 43   | 34  |
| 2 | E8 | GSK2043267A | 49   | 19  |
| 2 | F8 | GSK1905227A | -116 | -14 |
| 2 | G8 | GSK1996236A | -5   | -6  |
| 2 | H8 | GSK2111534A | -15  | -22 |
| 2 | A9 | GSK735816A  | 33   | -22 |
| 2 | B9 | GW356807A   | 3    | 28  |
| 2 | C9 | GSK163574A  | -83  | 8   |
| 2 | D9 | GSK153890A  | 55   | 10  |
| 2 | E9 | GSK237561A  | -124 | 17  |
| 2 | F9 | GR223839X   | 53   | 36  |
| 2 | G9 | GSK1519001A | -21  | -11 |
| 2 | H9 | GSK861337A  | -96  | 26  |

\* compounds inactive in MIC assay

27

28

| GSK P1 c = 25 $\mu$ M, RFP |      |     |     |     |     |     |     |      |     |     |     |     | GSK P2 c = 25 $\mu$ M, RFP |     |     |      |     |     |     |      |      |      |     |     |     | z' 0.66 |  |
|----------------------------|------|-----|-----|-----|-----|-----|-----|------|-----|-----|-----|-----|----------------------------|-----|-----|------|-----|-----|-----|------|------|------|-----|-----|-----|---------|--|
|                            | 1    | 2   | 3   | 4   | 5   | 6   | 7   | 8    | 9   | 10  | 11  | 12  |                            | 1   | 2   | 3    | 4   | 5   | 6   | 7    | 8    | 9    | 10  | 11  | 12  |         |  |
| <b>A</b>                   | -77  | -19 | -17 | -27 | -15 | -2  | -15 | -15  | -26 | -17 | -15 | -15 | <b>A</b>                   | -19 | -10 | -43  | -8  | -66 | -8  | 99   | -13  | 33   | 1   | -7  | 100 |         |  |
| <b>B</b>                   | -111 | -19 | -15 | -14 | -7  | -12 | -9  | -13  | -13 | -20 | -14 | -22 | <b>B</b>                   | -15 | -13 | -13  | -12 | 91  | 11  | -98  | 64   | 3    | 3   | -8  | 100 |         |  |
| <b>C</b>                   | -20  | -33 | -19 | -12 | -19 | -21 | -18 | -24  | 0   | -14 | -10 | -14 | <b>C</b>                   | -37 | -14 | 23   | 8   | 11  | 43  | -53  | 100  | -83  | 2   | -47 | 100 |         |  |
| <b>D</b>                   | -16  | -10 | -15 | -10 | -19 | -20 | -13 | -22  | -21 | 100 | -1  | -11 | <b>D</b>                   | -50 | 94  | -139 | -62 | 17  | -43 | 60   | 43   | 55   | 10  | -35 | 100 |         |  |
| <b>E</b>                   | -151 | -20 | -4  | -17 | -13 | -11 | -15 | -114 | -15 | 99  | -11 | -13 | <b>E</b>                   | -80 | -56 | -74  | 41  | 16  | 42  | 33   | 49   | -124 | 1   | -24 | 100 |         |  |
| <b>F</b>                   | -10  | -2  | -16 | -4  | -13 | -15 | -7  | -5   | 25  | -11 | -13 | -9  | <b>F</b>                   | -74 | -18 | -70  | 5   | -3  | -80 | -76  | -116 | 53   | -1  | -9  | 100 |         |  |
| <b>G</b>                   | -18  | -17 | -18 | -12 | -5  | -15 | -10 | -11  | -17 | -10 | -14 | -15 | <b>G</b>                   | -14 | -12 | -10  | 98  | -44 | -87 | -16  | -5   | -21  | -3  | -13 | 100 |         |  |
| <b>H</b>                   | -26  | -19 | -18 | -11 | -6  | -8  | 2   | -67  | -88 | -14 | -16 | -71 | <b>H</b>                   | -44 | -69 | -50  | -16 | -10 | -33 | -138 | -15  | -96  | -13 | -28 | 99  |         |  |

  

| GSK P1 c = 25 $\mu$ M, OD600 |     |    |     |     |     |     |     |     |     |     |     |     | GSK P2 c = 25 $\mu$ M, OD600 |     |    |     |     |    |     |     |     |    |     |     |     | z' 0.71 |  |
|------------------------------|-----|----|-----|-----|-----|-----|-----|-----|-----|-----|-----|-----|------------------------------|-----|----|-----|-----|----|-----|-----|-----|----|-----|-----|-----|---------|--|
|                              | 1   | 2  | 3   | 4   | 5   | 6   | 7   | 8   | 9   | 10  | 11  | 12  |                              | 1   | 2  | 3   | 4   | 5  | 6   | 7   | 8   | 9  | 10  | 11  | 12  |         |  |
| <b>A</b>                     | 43  | -5 | 6   | -14 | -11 | 56  | -13 | -3  | -46 | 28  | -52 | -14 | <b>A</b>                     | 3   | 26 | -27 | 21  | 29 | 13  | 99  | 23  | 33 | -14 | 10  | 100 |         |  |
| <b>B</b>                     | 34  | 8  | 3   | -13 | -2  | -47 | -4  | -1  | -32 | 8   | 6   | -5  | <b>B</b>                     | 20  | 30 | 36  | -12 | 87 | 1   | 19  | -17 | 39 | 10  | 7   | 100 |         |  |
| <b>C</b>                     | -23 | 1  | -15 | 0   | 0   | -32 | -15 | -7  | -22 | 11  | 5   | -22 | <b>C</b>                     | -20 | 8  | -45 | -17 | 1  | 5   | 30  | 101 | 10 | 6   | -54 | 100 |         |  |
| <b>D</b>                     | 15  | 22 | -8  | -9  | 15  | 10  | 15  | -11 | -44 | 103 | 29  | -16 | <b>D</b>                     | -14 | 82 | 24  | 12  | 27 | -12 | -8  | 16  | 32 | -13 | -11 | 100 |         |  |
| <b>E</b>                     | 61  | 4  | 31  | -25 | 13  | -20 | -17 | 63  | -36 | 102 | -45 | -15 | <b>E</b>                     | -12 | 5  | -6  | -27 | 13 | -14 | -15 | 11  | 28 | 11  | 2   | 100 |         |  |
| <b>F</b>                     | 18  | 2  | 15  | -13 | 0   | -51 | -1  | -8  | 38  | 6   | -18 | -20 | <b>F</b>                     | -27 | 11 | -21 | -10 | -1 | -1  | 2   | 17  | 3  | 3   | 11  | 100 |         |  |
| <b>G</b>                     | 14  | 17 | 44  | -34 | 10  | -47 | 20  | 8   | -47 | 6   | -30 | -23 | <b>G</b>                     | 0   | 1  | -48 | 93  | 4  | 28  | -5  | -3  | 7  | -2  | -13 | 100 |         |  |
| <b>H</b>                     | 12  | 23 | 12  | -4  | -6  | -28 | -28 | 2   | 39  | 14  | 21  | -16 | <b>H</b>                     | -1  | 10 | -32 | 20  | 20 | -9  | 16  | 9   | 22 | 0   | 11  | 101 |         |  |

  

|  |  |  |  |  |  |  |  |  |  |  |  |  |  |  |  |  |  |  |  |  |  |  |  |  | col 10 | col 12 |
|--|--|--|--|--|--|--|--|--|--|--|--|--|--|--|--|--|--|--|--|--|--|--|--|--|--------|--------|
|  |  |  |  |  |  |  |  |  |  |  |  |  |  |  |  |  |  |  |  |  |  |  |  |  | DMSO   | Genta  |
|  |  |  |  |  |  |  |  |  |  |  |  |  |  |  |  |  |  |  |  |  |  |  |  |  |        |        |

29

30 **FIGURE S1** Comparison between RFP and OD<sub>600</sub> data (screen of the GSK small molecule  
 31 leads) (**A** percentage of inhibition based on RFP signal Z' score = 0.66, **B** percentage of  
 32 inhibition based on OD<sub>600</sub> measurement, Z' score = 0.71)

33

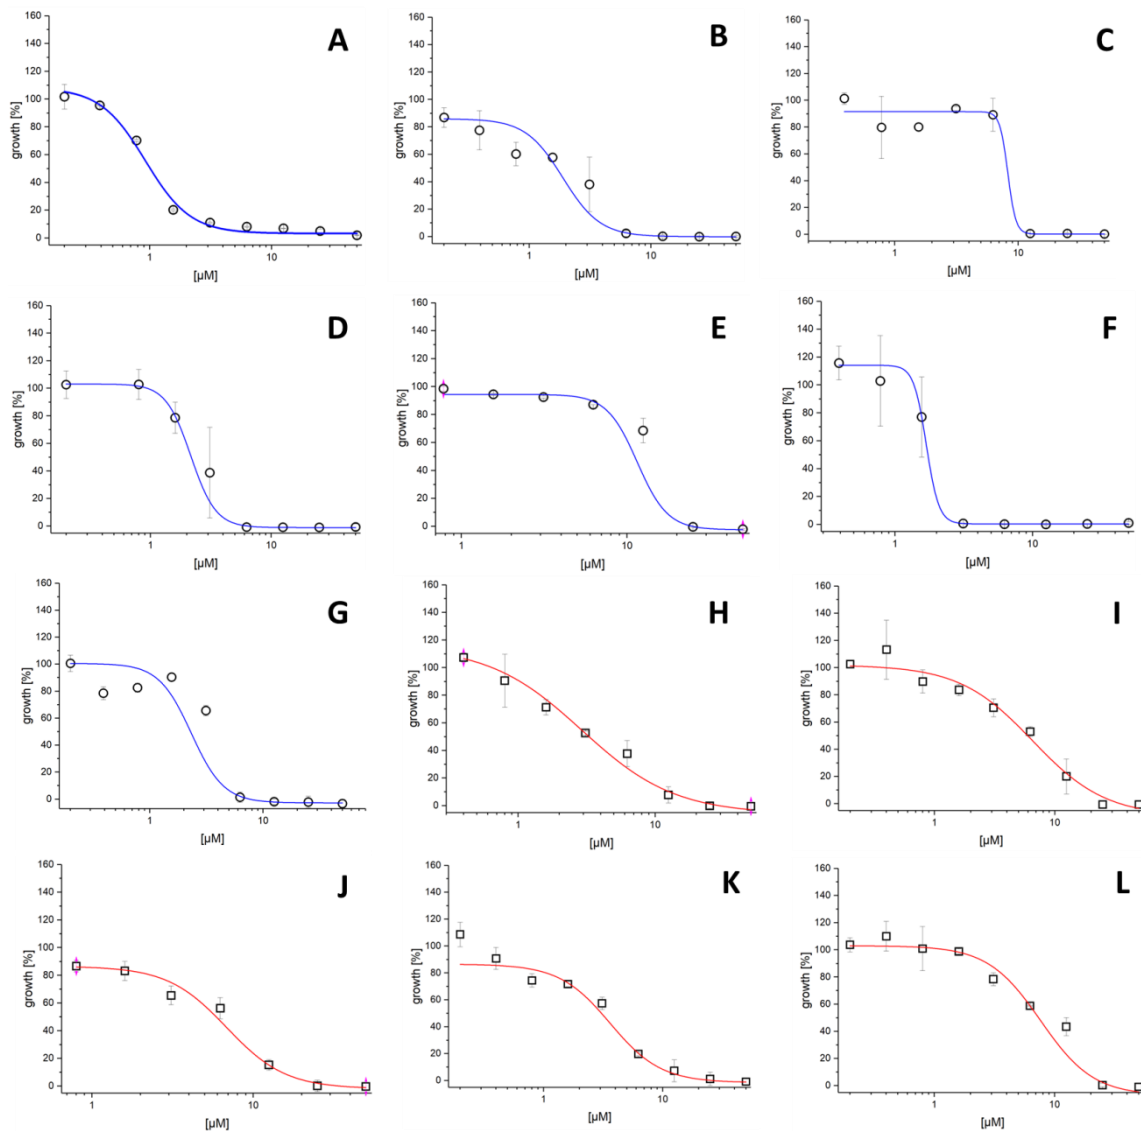

34

35

36 **FIGURE S2** Killing curves. Activity against *Mabs* in 7H9 (red line, squares) or MHII (blue line,

37 circles) **A** MMV687807, **B** MMV688978, **C** GSK2200160A, **D** GSK2200157A, **E** GSK1812410A,

38 **F** GW623128X, **G** MMV6887730, **H** BRL-7940SA, **I** BRL-10988SA, **J** BRL-8903SA, **K** BRL-

39 **10143SA**, **L** BRL-51091AM

40

41

42

43

44



45

46

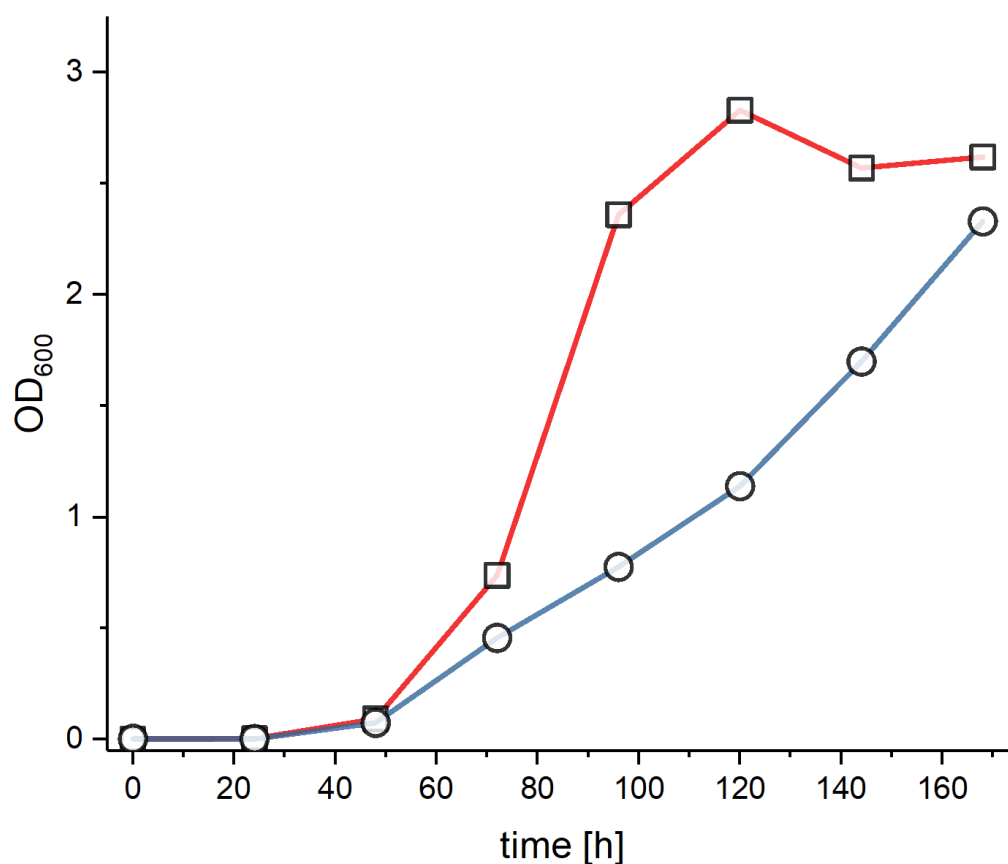

47

48 **FIGURE S3** Growth curves of *Mabs* in MHII (red line, squares) or 7H9 (blue line, circles).

<sup>1</sup> <http://www.pathogenbox.org/>

<sup>2</sup> Ballell L, Bates RH, Young RJ, Alvarez-Gomez D, Alvarez-Ruiz E, Barroso V, Blanco D, Crespo B, Escribano J, González R, Lozano S, Huss S, Santos-Villarejo A, Martín-Plaza JJ, Mendoza A, Rebollo-Lopez MJ, Remuiñan-Blanco M, Lavandera JL, Pérez-Herran E, Gamo-Benito FJ, García-Bustos JF, Barros D, Castro JP, Cammack N. 2013. Fueling open-source drug discovery: 177 small-molecule leads against tuberculosis. *Chem Med Chem* 8:313-321. <http://dx.doi.org/10.1002/cmdc.201200428>.
